# Supplementary material
Source: HighWire-hosted journal article supplement (http://molpharm.aspetjournals.org/highwire/filestream/76845/field_highwire_adjunct_files/0/SupplementalFigure.pdf)
Supplement: SupplementalFigure.pdf [file SupplementalFigure.pdf]

**MULTIPLE AFFINITY STATES OF cGMP-SPECIFIC PDE (PDE5) FOR  
SILDENAFIL INHIBITION DEFINED BY cGMP-DEPENDENT AND cGMP-  
INDEPENDENT MECHANISMS**

Irina G. Rybalkina, Xiao-Bo Tang, Sergei D. Rybalkin

**A**

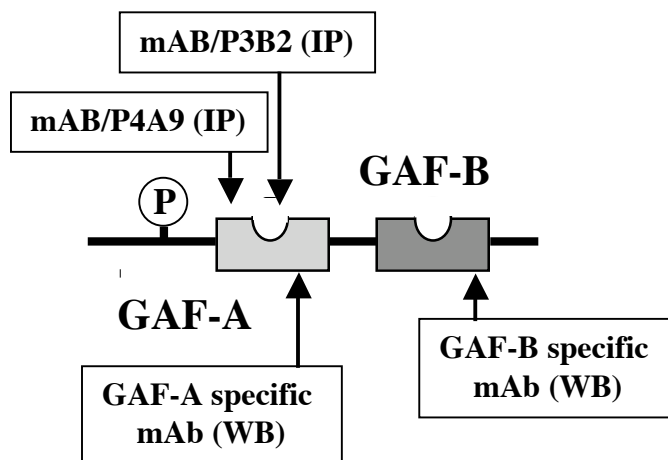

**B**

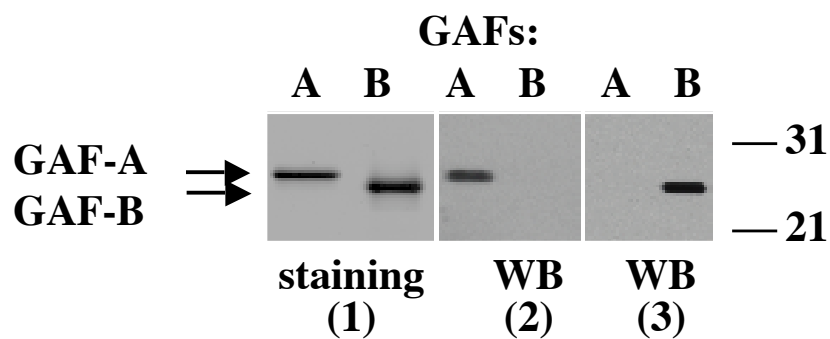

**Supplemental Figure 1**

**Supplemental Figure 1. GAF-domain specificity of monoclonal antibodies (mAbs) for PDE5.**

(A) Domain organization of the regulatory domain of PDE5 includes N-terminal part, GAF-A and GAF-B domains, connected by a linker. Generation of PDE5 mAbs, including mAb/P3B2 and mAb/P4A9 (A), raised against the total cGMP binding domain, has been described previously.

(B) GAF-A specific (2) and GAF-B (3) specific mAbs were characterized by Western blot analysis. Purified GAF-A (125-320 aa), and GAF-B (334-525 aa) proteins were separated by 12% SDS-PAGE followed by either silver staining (1) or Western blotting using GAF-A specific (2) and GAF-B (3) specific mAbs.
